# Supplementary material
Source: PubMed Central journal article supplement (PMC5484175)
Supplement: NIHMS866454-supplement-suppl.pdf [file NIHMS866454-supplement-suppl.pdf]

# Supplementary Materials for “Testing a Single Regression Coefficient in High Dimensional Linear Models”

Wei Lan, Ping-Shou Zhong, Runze Li, Hansheng Wang and Chih-Ling Tsai

*Southwestern University of Finance and Economics, Michigan State University,  
Pennsylvania State University, Peking University and University of California,  
Davis*

## Abstract

This supplemental material includes two sections. Section 1 presents simulation results for less sparse regression models. Specifically, Tables 1 and 2 report simulation results for Example 1, which contains 50 and 100 non-zero coefficients, respectively. In addition, Tables 3 and 4 report simulation results for Example 2, while Tables 5 and 6 report simulation results for Example 3. Section 2 presents simulation results for the predictors, which follow a polynomial decay structure.

**KEY WORDS:** Less Sparse Models; Simulation Results

*Section 1: Simulation Results For Less Sparse Models*

In this section, we present simulation results for Examples 1–3 under less sparse scenarios (i.e.,  $d_0 = 50$  and  $100$ ). Specifically, Tables 1–2, Tables 3–4, and Tables 5–6 report simulation results for Example 1, Example 2, and Example 3, respectively.

Table S1: Simulation results for Example 1 with  $\alpha = 5\%$ ,  $q = 5\%$  and  $d_0 = 50$ .

| $p$  | $n$ | Methods | ES    | EP    | FDR   | TR    | FR    |
|------|-----|---------|-------|-------|-------|-------|-------|
| 1000 | 100 | MUR     | 0.054 | 0.347 | 0.684 | 0.318 | 0.002 |
|      |     | LDPE    | 0.148 | 0.289 | 0.327 | 0.260 | 0.015 |
|      |     | CPS     | 0.056 | 0.182 | 0.106 | 0.177 | 0.000 |
|      | 200 | MUR     | 0.052 | 0.526 | 0.593 | 0.618 | 0.006 |
|      |     | LDPE    | 0.127 | 0.442 | 0.285 | 0.484 | 0.011 |
|      |     | CPS     | 0.051 | 0.329 | 0.086 | 0.358 | 0.000 |
|      | 500 | MUR     | 0.053 | 0.831 | 0.605 | 0.853 | 0.015 |
|      |     | LDPE    | 0.083 | 0.634 | 0.226 | 0.695 | 0.007 |
|      |     | CPS     | 0.052 | 0.473 | 0.063 | 0.508 | 0.000 |
| 2000 | 100 | MUR     | 0.058 | 0.285 | 0.764 | 0.264 | 0.005 |
|      |     | LDPE    | 0.183 | 0.207 | 0.418 | 0.229 | 0.032 |
|      |     | CPS     | 0.054 | 0.138 | 0.148 | 0.126 | 0.000 |
|      | 200 | MUR     | 0.053 | 0.476 | 0.638 | 0.507 | 0.015 |
|      |     | LDPE    | 0.144 | 0.418 | 0.322 | 0.451 | 0.022 |
|      |     | CPS     | 0.054 | 0.260 | 0.116 | 0.303 | 0.000 |
|      | 500 | MUR     | 0.051 | 0.754 | 0.592 | 0.792 | 0.033 |
|      |     | LDPE    | 0.090 | 0.549 | 0.253 | 0.553 | 0.016 |
|      |     | CPS     | 0.051 | 0.437 | 0.077 | 0.451 | 0.000 |

Table S2: Simulation results for Example 1 with  $\alpha = 5\%$ ,  $q = 5\%$  and  $d_0 = 100$ .

| $p$  | $n$ | Methods | ES    | EP    | FDR   | TR    | FR    |
|------|-----|---------|-------|-------|-------|-------|-------|
| 1000 | 100 | MUR     | 0.056 | 0.277 | 0.613 | 0.294 | 0.008 |
|      |     | LDPE    | 0.184 | 0.228 | 0.286 | 0.253 | 0.022 |
|      |     | CPS     | 0.054 | 0.098 | 0.125 | 0.137 | 0.000 |
|      | 200 | MUR     | 0.053 | 0.459 | 0.586 | 0.476 | 0.015 |
|      |     | LDPE    | 0.143 | 0.392 | 0.223 | 0.416 | 0.009 |
|      |     | CPS     | 0.054 | 0.258 | 0.094 | 0.274 | 0.000 |
|      | 500 | MUR     | 0.053 | 0.774 | 0.558 | 0.753 | 0.020 |
|      |     | LDPE    | 0.108 | 0.510 | 0.182 | 0.547 | 0.004 |
|      |     | CPS     | 0.054 | 0.418 | 0.080 | 0.452 | 0.000 |
| 2000 | 100 | MUR     | 0.057 | 0.243 | 0.774 | 0.259 | 0.009 |
|      |     | LDPE    | 0.201 | 0.195 | 0.506 | 0.201 | 0.025 |
|      |     | CPS     | 0.055 | 0.083 | 0.152 | 0.113 | 0.000 |
|      | 200 | MUR     | 0.053 | 0.422 | 0.679 | 0.451 | 0.014 |
|      |     | LDPE    | 0.151 | 0.361 | 0.331 | 0.380 | 0.016 |
|      |     | CPS     | 0.053 | 0.227 | 0.117 | 0.254 | 0.000 |
|      | 500 | MUR     | 0.052 | 0.707 | 0.624 | 0.731 | 0.018 |
|      |     | LDPE    | 0.120 | 0.468 | 0.206 | 0.509 | 0.005 |
|      |     | CPS     | 0.052 | 0.382 | 0.084 | 0.411 | 0.000 |

Table S3: Simulation results for Example 2 with  $\alpha = 5\%$ ,  $q = 5\%$  and  $d_0 = 50$ .

| $p$  | $n$ | Test | ES    | EP    | FDR   | TR    | FR    |
|------|-----|------|-------|-------|-------|-------|-------|
| 1000 | 100 | MUR  | 0.057 | 0.509 | 0.339 | 0.522 | 0.008 |
|      |     | LDPE | 0.177 | 0.423 | 0.206 | 0.458 | 0.027 |
|      |     | CPS  | 0.055 | 0.246 | 0.127 | 0.266 | 0.000 |
|      | 200 | MUR  | 0.055 | 0.722 | 0.341 | 0.749 | 0.011 |
|      |     | LDPE | 0.139 | 0.613 | 0.153 | 0.653 | 0.016 |
|      |     | CPS  | 0.052 | 0.405 | 0.118 | 0.418 | 0.000 |
|      | 500 | MUR  | 0.051 | 0.906 | 0.332 | 0.925 | 0.017 |
|      |     | LDPE | 0.092 | 0.789 | 0.128 | 0.805 | 0.008 |
|      |     | CPS  | 0.050 | 0.661 | 0.077 | 0.690 | 0.000 |
| 2000 | 100 | MUR  | 0.059 | 0.439 | 0.426 | 0.458 | 0.010 |
|      |     | LDPE | 0.193 | 0.366 | 0.228 | 0.332 | 0.031 |
|      |     | CPS  | 0.056 | 0.139 | 0.130 | 0.182 | 0.000 |
|      | 200 | MUR  | 0.054 | 0.665 | 0.399 | 0.689 | 0.015 |
|      |     | LDPE | 0.144 | 0.548 | 0.177 | 0.574 | 0.018 |
|      |     | CPS  | 0.052 | 0.339 | 0.123 | 0.327 | 0.000 |
|      | 500 | MUR  | 0.051 | 0.813 | 0.342 | 0.852 | 0.020 |
|      |     | LDPE | 0.095 | 0.706 | 0.130 | 0.735 | 0.009 |
|      |     | CPS  | 0.050 | 0.612 | 0.082 | 0.651 | 0.000 |

Table S4: Simulation results for Example 2 with  $\alpha = 5\%$ ,  $q = 5\%$  and  $d_0 = 100$ .

| $p$  | $n$ | Test | ES    | EP    | FDR   | TR    | FR    |
|------|-----|------|-------|-------|-------|-------|-------|
| 1000 | 100 | MUR  | 0.058 | 0.442 | 0.397 | 0.461 | 0.008 |
|      |     | LDPE | 0.203 | 0.365 | 0.254 | 0.368 | 0.030 |
|      |     | CPS  | 0.054 | 0.144 | 0.139 | 0.182 | 0.000 |
|      | 200 | MUR  | 0.056 | 0.661 | 0.338 | 0.685 | 0.012 |
|      |     | LDPE | 0.145 | 0.504 | 0.196 | 0.539 | 0.015 |
|      |     | CPS  | 0.051 | 0.301 | 0.106 | 0.344 | 0.000 |
|      | 500 | MUR  | 0.054 | 0.852 | 0.299 | 0.863 | 0.015 |
|      |     | LDPE | 0.103 | 0.707 | 0.156 | 0.734 | 0.009 |
|      |     | CPS  | 0.050 | 0.584 | 0.082 | 0.611 | 0.000 |
| 2000 | 100 | MUR  | 0.059 | 0.368 | 0.411 | 0.403 | 0.011 |
|      |     | LDPE | 0.227 | 0.301 | 0.276 | 0.312 | 0.032 |
|      |     | CPS  | 0.055 | 0.118 | 0.146 | 0.154 | 0.000 |
|      | 200 | MUR  | 0.055 | 0.581 | 0.354 | 0.602 | 0.016 |
|      |     | LDPE | 0.148 | 0.429 | 0.205 | 0.451 | 0.019 |
|      |     | CPS  | 0.053 | 0.266 | 0.119 | 0.289 | 0.000 |
|      | 500 | MUR  | 0.052 | 0.813 | 0.312 | 0.829 | 0.023 |
|      |     | LDPE | 0.099 | 0.619 | 0.157 | 0.657 | 0.009 |
|      |     | CPS  | 0.051 | 0.551 | 0.089 | 0.561 | 0.000 |

Table S5: Simulation results for Example 3 with  $\alpha = 5\%$ ,  $q = 5\%$  and  $d_0 = 50$ .

| $p$  | $n$ | Test | ES    | EP    | FDR   | TR    | FR    |
|------|-----|------|-------|-------|-------|-------|-------|
| 1000 | 100 | MUR  | 1.000 | 1.000 | 0.999 | 1.000 | 1.000 |
|      |     | LDPE | 0.138 | 0.438 | 0.307 | 0.456 | 0.009 |
|      |     | CPS  | 0.058 | 0.297 | 0.138 | 0.311 | 0.000 |
|      | 200 | MUR  | 1.000 | 1.000 | 0.999 | 1.000 | 1.000 |
|      |     | LDPE | 0.107 | 0.731 | 0.267 | 0.754 | 0.006 |
|      |     | CPS  | 0.050 | 0.502 | 0.112 | 0.532 | 0.000 |
|      | 500 | MUR  | 1.000 | 1.000 | 0.999 | 1.000 | 1.000 |
|      |     | LDPE | 0.091 | 0.903 | 0.185 | 0.933 | 0.003 |
|      |     | CPS  | 0.051 | 0.722 | 0.076 | 0.774 | 0.000 |
| 2000 | 100 | MUR  | 1.000 | 1.000 | 0.997 | 1.000 | 1.000 |
|      |     | LDPE | 0.148 | 0.387 | 0.284 | 0.405 | 0.008 |
|      |     | CPS  | 0.057 | 0.229 | 0.129 | 0.251 | 0.000 |
|      | 200 | MUR  | 1.000 | 1.000 | 0.997 | 1.000 | 1.000 |
|      |     | LDPE | 0.119 | 0.643 | 0.218 | 0.650 | 0.004 |
|      |     | CPS  | 0.056 | 0.459 | 0.097 | 0.477 | 0.000 |
|      | 500 | MUR  | 1.000 | 1.000 | 0.997 | 1.000 | 1.000 |
|      |     | LDPE | 0.095 | 0.822 | 0.172 | 0.851 | 0.002 |
|      |     | CPS  | 0.051 | 0.684 | 0.069 | 0.755 | 0.000 |

Table S6: Simulation results for Example 3 with  $\alpha = 5\%$ ,  $q = 5\%$  and  $d_0 = 100$ .

| $p$  | $n$ | Test | ES    | EP    | FDR   | TR    | FR    |
|------|-----|------|-------|-------|-------|-------|-------|
| 1000 | 100 | MUR  | 1.000 | 1.000 | 0.998 | 1.000 | 1.000 |
|      |     | LDPE | 0.145 | 0.378 | 0.326 | 0.403 | 0.012 |
|      |     | CPS  | 0.059 | 0.229 | 0.129 | 0.258 | 0.000 |
|      | 200 | MUR  | 1.000 | 1.000 | 0.998 | 1.000 | 1.000 |
|      |     | LDPE | 0.127 | 0.619 | 0.249 | 0.652 | 0.008 |
|      |     | CPS  | 0.051 | 0.477 | 0.112 | 0.502 | 0.000 |
|      | 500 | MUR  | 1.000 | 1.000 | 0.998 | 1.000 | 1.000 |
|      |     | LDPE | 0.102 | 0.811 | 0.202 | 0.792 | 0.005 |
|      |     | CPS  | 0.052 | 0.674 | 0.072 | 0.706 | 0.000 |
| 2000 | 100 | MUR  | 1.000 | 1.000 | 0.997 | 1.000 | 1.000 |
|      |     | LDPE | 0.159 | 0.329 | 0.287 | 0.342 | 0.009 |
|      |     | CPS  | 0.055 | 0.175 | 0.130 | 0.207 | 0.000 |
|      | 200 | MUR  | 1.000 | 1.000 | 0.997 | 1.000 | 1.000 |
|      |     | LDPE | 0.134 | 0.542 | 0.238 | 0.570 | 0.005 |
|      |     | CPS  | 0.057 | 0.408 | 0.103 | 0.428 | 0.000 |
|      | 500 | MUR  | 1.000 | 1.000 | 0.997 | 1.000 | 1.000 |
|      |     | LDPE | 0.092 | 0.705 | 0.168 | 0.734 | 0.003 |
|      |     | CPS  | 0.050 | 0.599 | 0.070 | 0.633 | 0.000 |

*Section 2: Simulation Results for Example 1 with Predictors exhibiting Polynomial Decay*

Consider a linear regression model with predictors  $X_i$  being generated from a multivariate normal distribution with mean 0 and covariance  $\Sigma = I_p + uu^\top$ , where  $u = (u_1, \dots, u_p)^\top \in \mathbb{R}^p$ ,  $u_j = \delta j^{-2}$  for  $j = 1, \dots, p$ , and  $\delta$  is a finite constant. The regression coefficients  $\beta$ , the number of non-zero coefficients  $d_0$ , and the variance of  $\varepsilon_i$  ( $\sigma_i^2$ ), are the same as those in Example 1 of the manuscript. Since the simulation results for  $d_0 = 10, 50$  and  $100$  and various  $\delta$  values yield a similar pattern, we only present the results for  $d_0 = 10$  and  $\delta = 1$  in Table S7 given below.

Table S7: Simulation results for Example 1 when the predictors exhibit polynomial decay and  $\alpha = 5\%$ ,  $q = 5\%$ ,  $\delta = 1$  and  $d_0 = 10$ .

| $p$  | $n$ | Methods | ES    | EP    | FDR   | TR    | FR    |
|------|-----|---------|-------|-------|-------|-------|-------|
| 1000 | 100 | MUR     | 0.057 | 0.893 | 0.426 | 0.906 | 0.003 |
|      |     | LDPE    | 0.069 | 0.795 | 0.285 | 0.764 | 0.030 |
|      |     | CPS     | 0.054 | 0.431 | 0.094 | 0.429 | 0.000 |
|      | 200 | MUR     | 0.055 | 1.000 | 0.392 | 1.000 | 0.010 |
|      |     | LDPE    | 0.058 | 0.905 | 0.263 | 0.882 | 0.009 |
|      |     | CPS     | 0.052 | 0.729 | 0.076 | 0.706 | 0.000 |
|      | 500 | MUR     | 0.051 | 1.000 | 0.325 | 1.000 | 0.016 |
|      |     | LDPE    | 0.052 | 1.000 | 0.143 | 1.000 | 0.002 |
|      |     | CPS     | 0.055 | 0.955 | 0.056 | 0.982 | 0.000 |
| 2000 | 100 | MUR     | 0.059 | 0.794 | 0.524 | 0.802 | 0.006 |
|      |     | LDPE    | 0.072 | 0.622 | 0.347 | 0.643 | 0.035 |
|      |     | CPS     | 0.052 | 0.385 | 0.102 | 0.379 | 0.000 |
|      | 200 | MUR     | 0.051 | 1.000 | 0.462 | 1.000 | 0.018 |
|      |     | LDPE    | 0.059 | 0.853 | 0.261 | 0.821 | 0.010 |
|      |     | CPS     | 0.055 | 0.682 | 0.082 | 0.652 | 0.000 |
|      | 500 | MUR     | 0.054 | 1.000 | 0.452 | 1.000 | 0.025 |
|      |     | LDPE    | 0.053 | 1.000 | 0.155 | 1.000 | 0.004 |
|      |     | CPS     | 0.056 | 0.902 | 0.056 | 0.911 | 0.000 |
